# Supplementary material
Source: PubMed Central journal article supplement (PMC7303965)
Supplement: am0c03794_si_001.pdf [file am0c03794_si_001.pdf]

# Supporting Information

## Tiled Monolayer Films of 2D Molybdenum

## Disulphide Nanoflakes Assembled at

## Liquid/Liquid Interfaces

*Joseph Neilson, Michael P. Avery, Brian Derby\**

Department of Materials, University of Manchester, Oxford Rd., Manchester M13 9PL, UK.

\*Corresponding Author [brian.derby@manchester.ac.uk](mailto:brian.derby@manchester.ac.uk)

## Stability of Particles at Interfaces

The effects of gravity can be neglected if the ratio between gravitational forces and capillary forces is sufficiently low. These can be compared using the dimensionless bond number

$$Bo = \Delta\rho g d^2 / \gamma_{12} \quad (S1)$$

Where  $\Delta\rho$  is the difference in density between the phases present,  $g = 9.8 \text{ ms}^{-2}$  is the acceleration of gravity,  $d$  is the characteristic length of the system taken as the diameter of the flakes or particles at the interface and  $\gamma_{12}$  is the interfacial tension between the immiscible liquids. Here  $\Delta\rho \approx 4000 \text{ kg.m}^{-3}$ ,  $\gamma_{12} = 55 \text{ mNm}^{-1}$  and  $d$  is taken as  $10^{-6} \text{ m}$ , giving  $Bo = 8 \times 10^{-7}$ , showing that capillary forces clearly dominate.

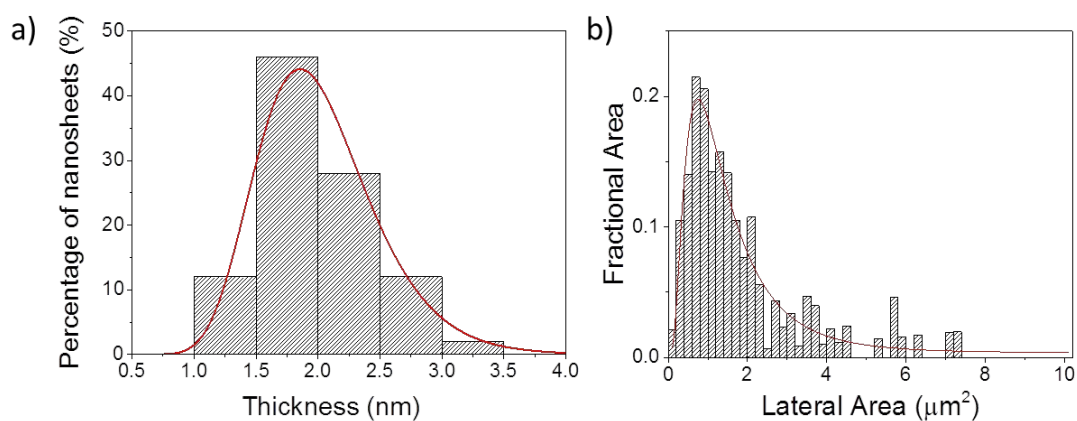

**Figure S1:** a) thickness ( $n = 50$ ) and b) lateral area ( $n > 600$ ) histograms for the  $\text{MoS}_2$  dispersion separated by cascade centrifugation at 8-12 kRPM. Thickness histogram added again for completeness.

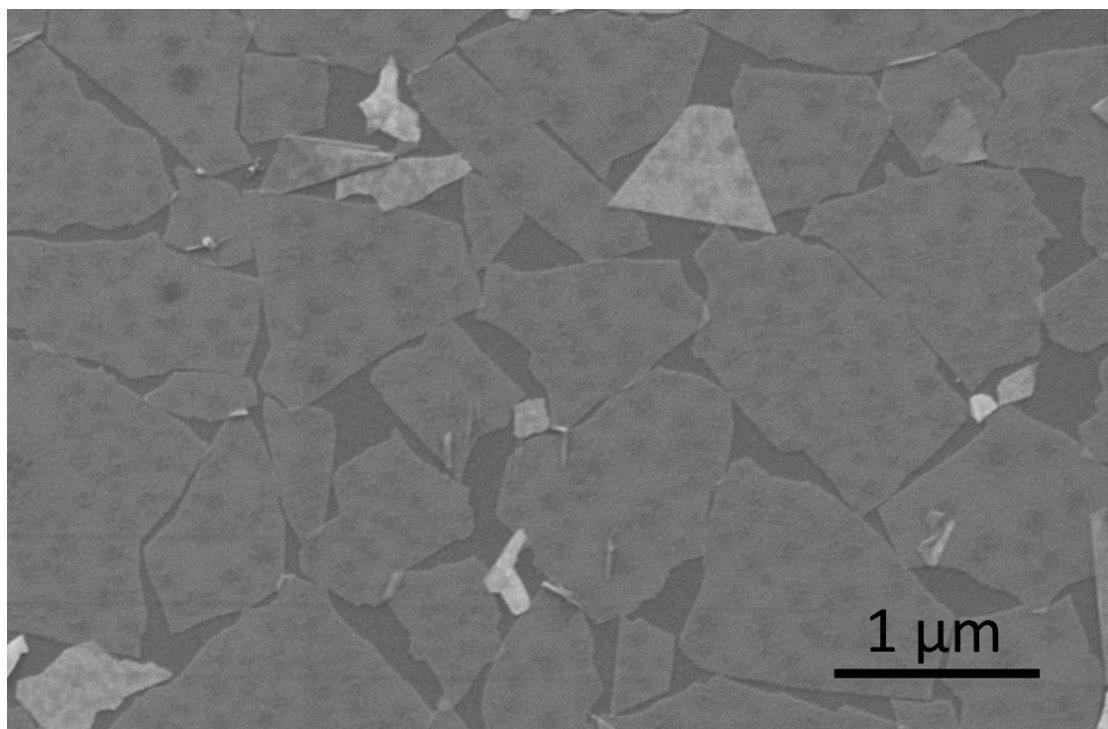

**Figure S2:** High magnification (50000 x) SEM image of liquid/liquid interface assembled thin film.

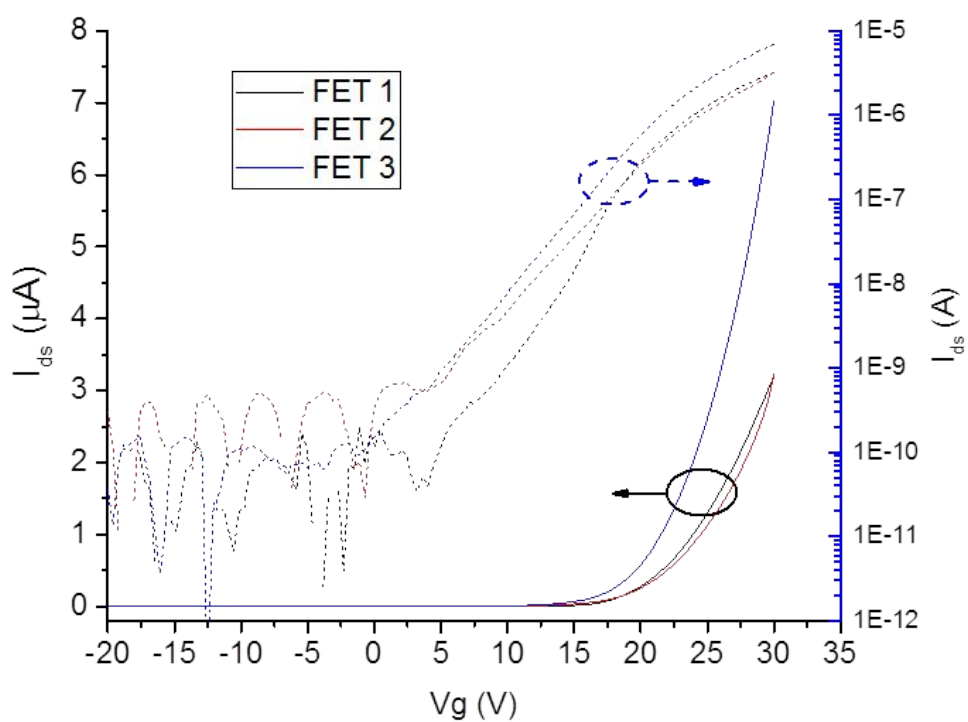

**Figure S3:** Three example FETs assembled in the same manner as reported in the main body (FET3 is the demonstrator device in the main body). Mobilities extracted from the  $I_{ds}/V_g$  curves are 0.28, 0.443, and 0.726 for FET1, FET2, and FET3 respectively.

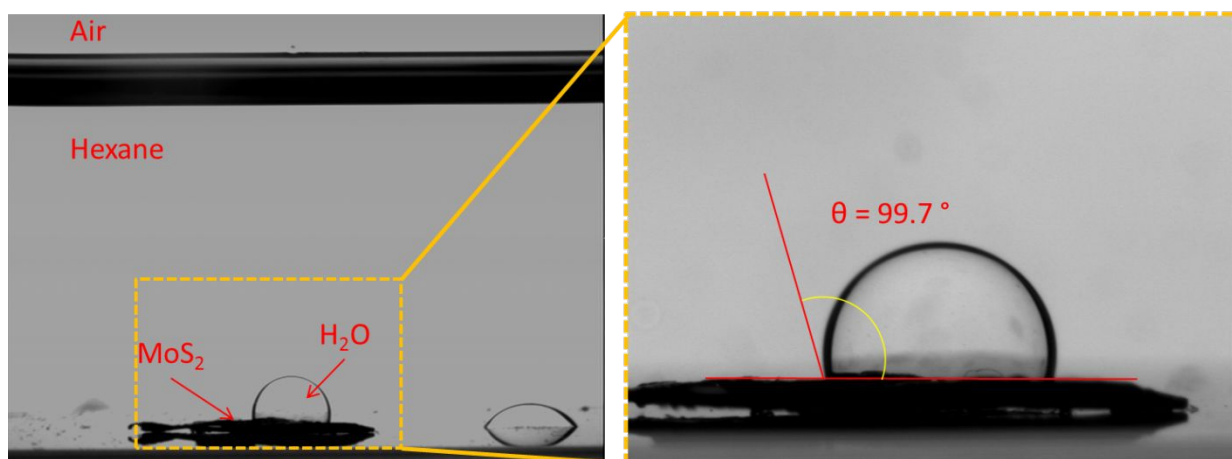

**Figure S4:** 3 Phase contact angle measurement of water droplet on MoS<sub>2</sub> surface in hexane environment.

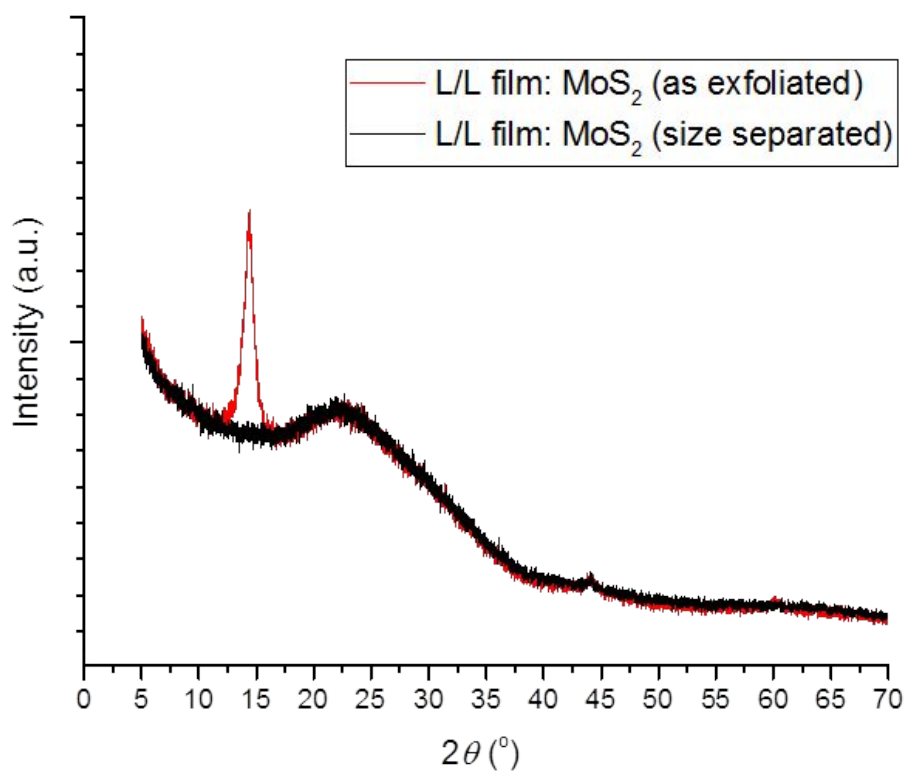

**Figure S5:** XRD patterns for liquid/liquid interface assembled thin films of MoS<sub>2</sub> flakes as prepared, and size selected to narrow size distribution (average flake thickness 2 nm, 1-2 monolayers MoS<sub>2</sub>). The 002 peak is not visible in the size selected film indicating the presence of less than 5 MoS<sub>2</sub> monolayers and therefore the ultrathin nature of the film and the lack of flake overlap.<sup>1,2</sup>

| Device type                              | Mobility | on/off           | Processing temp (°C) | reference        |
|------------------------------------------|----------|------------------|----------------------|------------------|
| Single crystal                           | 0.2      | 10               | N/A                  | 55               |
| CVD Grown MoS <sub>2</sub> FETs          | 6        | 10 <sup>5</sup>  | 850                  | 62               |
|                                          | 10       | 10 <sup>8</sup>  | 1000                 | 63               |
|                                          | 0.02     | 10 <sup>3</sup>  | 650                  | 64               |
|                                          | 0.68     | <10 <sup>4</sup> | 700                  | 65               |
|                                          | 24       | 10 <sup>6</sup>  | 750                  | 66               |
| Solution processed MoS <sub>2</sub> FETs | 0.0004   | 22               | 200                  | 10               |
|                                          | 0.1      | 600              | N/A                  | 67               |
|                                          | 0.3      | 2                | 50                   | 68               |
|                                          | 10       | 10 <sup>6</sup>  | 400                  | 57               |
|                                          | <0.1     | <10              | 450                  | 69               |
|                                          | 0.73     | 10 <sup>5</sup>  | 200                  | <b>This work</b> |

**Table S1:** Values used in the main text graph (Figure 6). References correspond to the main body references section.

## References

- (1) Ramakrishna Matte, H. S. S.; Gomathi, A.; Manna, A. K.; Late, D. J.; Datta, R.; Pati, S. K.; Rao, C. N. R. MoS<sub>2</sub> and WS<sub>2</sub> Analogues of Graphene. *Angew. Chemie Int. Ed.* **2010**, *49*, 4059–4062.
- (2) Rao, C. N. R.; Nag, A. Inorganic Analogues of Graphene. *Eur. J. Inorg. Chem.* **2010**, *27*, 4244–4250.
